# Supplementary material
Source: Research Square preprint supplement (doi:10.21203/rs.3.rs-9665189/v1)
Supplement: Supplementary file 1 [file 403bb3b7761b15ac64c828dd.docx]

**Supplementary Data**

**Red Beetroot Pomace-Mediated Green Synthesis of Ag/CeO2 and Ag/CeO2/Chitosan Nanocomposites with Enhanced Antioxidant and Antibacterial Activity**

**Section S1: Materials and Methods**

**1. Reagents and Chemicals**

All reagents and chemicals used in this study were of high analytical or microbiological grade and were utilized without further purification. Silver nitrate (AgNO3, ≥99.8% purity, analytical grade) was purchased from Sigma-Aldrich, Germany, and served as the silver precursor for nanoparticle formation. Cerium dioxide (CeO2, ≥99% purity, analytical grade) was obtained from Merck, Germany. Chitosan (biopolymer grade, ≥99% purity) was supplied by Loba Chemie Pvt. Ltd., India, and was employed as a natural stabilizing and coating matrix. For phytochemical and antioxidant analyses, Folin-Ciocalteu reagent (2 N, spectrophotometric grade), sodium carbonate (Na2CO3, ≥99% purity), gallic acid (≥98% purity), catechin hydrate (≥98% purity), aluminium chloride hexahydrate (AlCl3·6H2O, ≥99% purity), sodium nitrite (NaNO2, ≥99% purity), methanol (99.8% purity, HPLC grade), 2,2-diphenyl-1-picrylhydrazyl (DPPH, ≥95% purity, assay grade), and ascorbic acid (vitamin C, ≥99% purity) were all purchased from Sigma-Aldrich or Merck, Germany. In the ferric reducing power assay, potassium ferricyanide (K3[Fe(CN)6], ≥99% purity) and ferric chloride (FeCl3, ≥98% purity) were obtained from Sigma-Aldrich, Germany, while trichloroacetic acid (TCA, ≥99% purity) was supplied by Merck, Germany. Microbiological media, including Mueller-Hinton agar (ISO-certified) and nutrient broth (microbiology grade), were procured from Oxoid Ltd., United Kingdom, and HiMedia Laboratories Pvt. Ltd., India, respectively. All chemicals were carefully stored according to the manufacturers’ instructions to maintain stability and purity.

**2. Instruments**

Fourier transform infrared (FTIR) spectra were obtained using a Bruker Tensor 27 FTIR spectrometer equipped with an ATR accessory, operating in the range of 3850-350 cm-1. UV-Vis absorption spectra were recorded on a Shimadzu UV-2600 spectrophotometer (Kyoto, Japan) using quartz cuvettes. X-ray photoelectron spectroscopy (XPS) measurements were carried out using a Thermo Scientific ESCALAB 250Xi spectrometer (USA) with Al Kα radiation (1486.6 eV). Zeta potential measurements were performed using a Malvern Zetasizer Nano ZS (Malvern Instruments Ltd., UK). High-resolution transmission electron microscopy (HR-TEM) was conducted using a JEOL JEM-2100 microscope operating at 200 kV, while scanning electron microscopy (SEM) and energy-dispersive X-ray (EDX) analyses were performed on a JEOL JSM-6510LV SEM equipped with an EDX detector. X-ray diffraction (XRD) patterns were recorded using a PANalytical X’Pert PRO diffractometer (Netherlands) with Cu Kα radiation (λ = 1.5406 Å) over the 2θ range of 10-80°.

**3. Phytochemical Analyses**

**3.1. Folin-Ciocalteu Method**

Total phenolic content was assessed using the Folin-Ciocalteu reagent, with gallic acid employed for calibration [1]. In brief, a defined volume of each sample was reacted with diluted Folin-Ciocalteu reagent and allowed to stand for a short period. Subsequently, sodium carbonate solution (7.5%, w/v) was added to initiate color development, and the mixtures were incubated at ambient temperature under dark conditions for 30 min. Absorbance was measured at 765 nm using a UV-visible spectrophotometer. Phenolic content was quantified from the gallic acid standard curve and expressed as mg gallic acid equivalents (GAE).

**3.2. Aluminum Chloride Colorimetric Method**

Total flavonoid content was determined by the aluminum chloride complexation assay using quercetin as the reference standard [2]. Briefly, the sample was combined with aluminum chloride solution (2%, w/v) and potassium acetate, followed by dilution with distilled water. The reaction mixture was maintained at room temperature for 30 min to facilitate flavonoid-aluminum complex formation. Absorbance was then recorded at 415 nm against an appropriate blank. Flavonoid concentration was calculated from the quercetin calibration curve and reported as mg quercetin equivalents (QE).

**3.3. Vanillin-Hydrochloric Acid Assay**

Condensed tannins were quantified using the vanillin-hydrochloric acid colorimetric assay, with catechin used as the standard compound [3]. In brief, the sample was mixed with freshly prepared vanillin solution (1%, w/v in methanol), followed by the addition of concentrated hydrochloric acid. The resulting mixture was incubated at room temperature for 20 min to allow chromophore formation. Absorbance was measured at 500 nm using a UV-Vis spectrophotometer. Tannin content was calculated based on the catechin standard curve and expressed as mg catechin equivalents (CE).

**3.4. Anthrone Assay**

Total carbohydrate content was determined using the anthrone colorimetric method with glucose as the reference standard [4]. Briefly, an appropriate volume of each sample was mixed with freshly prepared anthrone reagent (0.2% w/v anthrone in concentrated sulfuric acid) in a test tube. The reaction mixture was heated in a boiling water bath for 10 min, rapidly cooled to room temperature, and the absorbance was measured at 620 nm using a UV-Vis spectrophotometer. Glucose solutions at different concentrations were used to construct a calibration curve (y = 0.0041x; R2 = 0.9605), and total carbohydrate content was calculated from the linear regression equation and expressed as mg glucose equivalents (GE).

**Section S2: Results**

**Table S1.** Summary of UV-Vis absorption peaks, absorbance, and optical band gaps of Red Beetroot pomace extract and nanocomposites.

| Sample | λmax (nm) | Absorbance | Band Gap (eV) | Type of Transition |
| --- | --- | --- | --- | --- |
| Red Beetroot pomace extract | 512 | 0.859 | 1.0456 | π→π*, n→π* |
| Ag/CeO2 NC | 512 | 0.761 | 0.6515 | π→π*, n→π* (modified) |
| Ag/CeO2/Chitosan NC | 523 | 0.999 | 1.0403 | π→π*, n→π* (interacted) |

**Table S2.** FTIR spectral analysis of Red Beetroot pomace extract, Ag/CeO2 NC, and Ag/CeO2/Chitosan NC. Wavenumbers, characteristic functional groups, and assignments demonstrate the presence of hydroxyl, carbonyl, aromatic, and amide groups, confirming the interaction of biomolecules with metal nanoparticles and successful incorporation of Chitosan in the nanocomposite matrix.

| Sample | Wavenumber (cm-1) | Characteristic group | Interpretation |
| --- | --- | --- | --- |
| Red Beetroot pomace extract | 3316 | O-H | Phenolic and betalain hydroxyl stretching |
|  | 2936, 2878 | C-H | Aliphatic C-H stretching |
|  | 1649 | C=O | Carbonyl / amide stretching |
|  | 1593 | C=C | Aromatic ring vibrations |
|  | 1453, 1400 | CH2 | Bending and deformation |
|  | 1235-1012 | C-O, C-O-C | Polysaccharides and phenolics |
|  | 986-425 | C-H | Aromatic skeletal vibrations |
| Ag/CeO2 NC | 3344 | O-H | Coordinated hydroxyl groups |
|  | 2931 | C-H | Aliphatic stretching |
|  | 1626, 1593 | C=O / C=C | Carbonyl and aromatic vibrations |
|  | 1234-1012 | C-O | Retained biomolecular capping |
|  | 635-533 | Ce-O, Ce-O-Ce | Cerium oxide lattice vibrations |
|  | 424-377 | Ag-O | Silver-oxygen bonding |
| Ag/CeO2/Chitosan NC | 3324 | O-H | Hydrogen-bonded hydroxyl groups |
|  | 2935, 2877 | C-H | Aliphatic stretching |
|  | 1647, 1621 | Amide I (C=O) | Chitosan incorporation |
|  | 1595 | C=C | Aromatic vibrations |
|  | 1364-1330 | C-N / Amide III | Chitosan backbone |
|  | 1234-1013 | C-O | Polysaccharide vibrations |
|  | 638-535 | Ce-O, Ce-O-Ce | Metal oxide framework |
|  | 422 | Ag-O | Silver oxide vibration |

**Table S3**. Zeta potential and DLS parameters of Ag/CeO2 and Ag/CeO2/Chitosan nanocomposites.

| Sample | Zeta Potential (mV) | Average Mobility (M.U.) | Mean Diameter (nm) | PDI | Diffusion Coefficient (cm2 s-1) |
| --- | --- | --- | --- | --- | --- |
| Ag/CeO2 NC | +71.96 | -5.03 | 282.2 | 0.854 | 1.58 × 108 |
| Ag/CeO2/Chitosan NC | +72.27 | 12.03 | 176.2 | 0.225 | 2.53 × 108 |

**Table S4**. EDX analysis of Ag/CeO2 NC and Ag/CeO2/Chitosan NC.

| Sample / Elements | Weight % | Atomic % | Error % |
| --- | --- | --- | --- |
| Ag/CeO2 NC |  |  |  |
| O | 27.57 | 73.82 | 13.46 |
| Ag | 44.09 | 17.51 | 3.0 |
| Ce | 28.34 | 8.67 | 8.8 |
| Ag/CeO2/Chitosan NC |  |  |  |
| C | 0.26 | 0.82 | 99.99 |
| N | 5.69 | 15.41 | 20.73 |
| O | 26.19 | 62.09 | 13.32 |
| Ag | 40.89 | 14.38 | 2.17 |
| Ce | 26.97 | 7.30 | 7.31 |

**Table S5**. Elemental mapping analysis of Ag/CeO2 NC and Ag/CeO2/Chitosan NC.

| Sample / Elements | Composition % |
| --- | --- |
| Ag/CeO2 NC |  |
| O | 11 |
| Ag | 65 |
| Ce | 24 |
|  |  |
| Ag/CeO2/Chitosan NC | **Composition %** |
| C | 2 |
| N | 4 |
| O | 11 |
| Ag | 60 |
| Ce | 23 |

**Table S6**. XRD peak parameters and crystallite sizes of Ag/CeO2 nanocomposite.

| Phase | 2θ (°) | (hkl) | d-spacing (Å) | FWHM (°) | Rel. Intensity (%) | Crystallite Size (nm) |
| --- | --- | --- | --- | --- | --- | --- |
| AgCl | 28.758 | (111) | 3.1018 | 0.112 | 100.0 | 76.5 |
| CeO2 | 33.287 | (111) | 2.6894 | 0.211 | 39.5 | 41.0 |
| Ag | 38.295 | (111) | 2.3485 | 0.325 | 11.0 | 27.0 |
| AgCl | 47.690 | (220) | 1.9055 | 0.134 | 90.0 | 66.5 |
| CeO2 | 46.436 | (220) | 1.9539 | 0.245 | 30.9 | 35.2 |
| AgCl | 56.538 | (311) | 1.6264 | 0.138 | 85.2 | 67.4 |

**Table S7**. XRD peak parameters and crystallite sizes of Ag/CeO2/Chitosan nanocomposite.

| Phase | 2θ (°) | (hkl) | d-spacing (Å) | FWHM (°) | Rel. Intensity (%) | Crystallite Size (nm) |
| --- | --- | --- | --- | --- | --- | --- |
| AgCl | 28.731 | (111) | 3.1046 | 0.104 | 100.0 | 82.4 |
| CeO2 | 33.262 | (111) | 2.6913 | 0.112 | 34.6 | 77.4 |
| Ag | 38.279 | (111) | 2.3494 | 0.388 | 6.3 | 22.7 |
| AgCl | 47.653 | (220) | 1.9068 | 0.119 | 79.3 | 69.8 |
| AgCl | 56.503 | (311) | 1.6273 | 0.124 | 70.3 | 73.1 |

**Phytochemical Analysis**

**Table S8**. The results of the phytochemical analysis of the investigated extracted samples.

| Samples | Phenolic Content [a] | Flavonoid Content [b] | Tannin Content [c] | Carbohydrate Content [d] |
| --- | --- | --- | --- | --- |
| Red Beetroot pomace extract | 38.801±1.02 | 8.268±0.08 | 12.89±0.53 | 173.25±1.46 |
| Ag/CeO2 NC | 29.314±0.84 | 11.02±0.05 | 8.677±0.27 | 127.30±1.08 |
| Ag/CeO2/Chitosan NC | 25.276±0.53 | 5.949±0.17 | 5.358±0.33 | 163.86±1.49 |

**[a]** Phenolic Content “mg gallic acid/ g dry weight.”

**[b]** Flavonoid Content “mg catechin acid/ g dry weight.”

**[c]** Tannins Contents “mg tannic acid acid/ g dry weight.”

**[d]** Carbohydrate Content “mg GE/g dry weight”

**Antioxidant Activity**

**Table S9**. The antioxidant results of the tested samples.

| Samples | Concentrations (mg/mL) | % Remaining DPPH | % Scavenging Activity | IC50 (mg/mL) |
| --- | --- | --- | --- | --- |
| Red Beetroot pomace extract | 1.396 | 19.89±0.08 | 80.11±0.08 | 0.366±0.014 |
|  | 0.698 | 29.83±1.03 | 70.17±1.03 |  |
|  | 0.349 | 52.56±1.24 | 47.44±1.24 |  |
|  | 0.174 | 65.34±1.53 | 34.66±1.53 |  |
| Ag/CeO2 NC | 0.318 | 15.77±1.18 | 84.23±1.18 | 0.083±0.004 |
|  | 0.159 | 34.09±0.58 | 65.91±0.58 |  |
|  | 0.08 | 48.01±0.41 | 51.99±0.41 |  |
|  | 0.04 | 65.34±1.43 | 34.66±1.43 |  |
| Ag/CeO2/Chitosan NC | 0.172 | 15.2±0.71 | 84.8±0.71 | 0.043±0.005 |
|  | 0.086 | 32.67±0.43 | 67.33±0.43 |  |
|  | 0.043 | 51.14±0.92 | 48.86±0.92 |  |
|  | 0.021 | 61.08±0.51 | 38.92±0.51 |  |
| Ascorbic acid | 0.06 | 15.27±0.27 | 84.73±0.27 | 0.022±0.001 |
|  | 0.03 | 39.08±0.04 | 60.92±0.04 |  |
|  | 0.02 | 61.07±0.06 | 38.93±0.06 |  |
|  | 0.01 | 74.81±0.18 | 25.19±0.18 |  |

**Table S10**. Ferric reducing power (expressed as mg ascorbic acid equivalents per g of dry weight, mg AAE/g DW) and total antioxidant capacity (TAC, mg AAE/g DW) of the investigated plant extracts and nanocomposite samples.

| Sample | Ferric Reducing Power (mg AAE/g DW) | TAC (mg AAE/g DW) |
| --- | --- | --- |
| Red Beetroot pomace extract | 43.0 | 84.91 |
| Ag/CeO2 NC | 100.96 | 98.54 |
| Ag/CeO2/Chitosan NC | 106.14 | 104.37 |

**Table S11**. Antibacterial activity of Red Beetroot pomace extract, Ag/CeO2 NC, and Ag/CeO2/Chitosan NC against selected Gram-negative and Gram-positive pathogenic bacteria, expressed as inhibition zone diameters (mm). Ciprofloxacin (5 µg/disc) was used as a positive control. Values are presented as mean ± standard deviation (n = 3). NA indicates no detectable antibacterial activity.

| Microorganisms | Red Beetroot pomace extract | Ag/CeO2 NC | Ag/CeO2/Chitosan NC | Ciprofloxacin (5 µ) |
| --- | --- | --- | --- | --- |
| *Gram-negative bacteria* |  |  |  |  |
| *Escherichia coli* (ATCC 10536) | NA | 16±1.03 | 17±1.06 | 32.3±1.61 |
| *Salmonella typhimurium* (ATCC 25566) | NA | NA | NA | 27±1.37 |
| *Klebsiella pneumonia* (ATCC 10031) | NA | 14±0.95 | 15±1.11 | 35±1.43 |
| *Enterobacter cloacae* (DMS 30054) | NA | NA | NA | 29±1.51 |
| *Gram-positive bacteria* |  |  |  |  |
| *Bacillus subtilis* (DMS 1088) | NA | 14.3±0.83 | 15±1.25 | 34±1.26 |
| *Bacillus cereus* (EMCC number 1080) | NA | 14±1.04 | 15±1.41 | 24±1.28 |
| *Staphylococcus aureus* (ATCC 6538) | NA | 14±1.53 | 16±1.31 | 28±1.37 |
| *Staphylococcus epidermidis* (EMCC number 1353t) | NA | 16±1.14 | 17±1.16 | 27±1.17 |

**References**

[1] K.M. Elattar, M.S. El-Hersh, G. Bonanomi, A.M. Abd-ElGawad, Y.A. El-Amier, A.A. Al-Huqail, Eco-friendly fabrication of Ag/Fe2O3 and Ag/Co nanocomposites *via* *Anabasis articulata*: GC-MS, phytochemical analysis, antioxidant, antimicrobial, and insecticidal activities, *RSC Adv.* **15** (2025) 39336–39354.

[2] K.M. Elattar, N.M. Askar, N.H. Elhusseini, D.A. Omar, A.S. Ashry, M.M. Keshk, T.R. Saad, A.M. Elzeghiby, A.H. Elnakadi, M.Y. Aboelfatoh, M. Abdelaal, Green synthesis of Ag/TiO2 and Ag/Co/TiO2 nanocomposites from *Ceratonia siliqua* extract for antioxidant and antibacterial applications, *ChemistrySelect* **10** (2025) e03394.

[3] A.A. Alanazi, W.I. Saber, M.A. AlDamen, K.M. Elattar, Sustainable green synthesis of high-performance Fe2O3@CeO2-pullulan nanocomposite for efficient dye removal and antifungal applications, *Int. J. Biol. Macromol.* **308** (2025) 142533.

[4] A. Leyva, A. Quintana, M. Sánchez, E.N. Rodríguez, J. Cremata, J.C. Sánchez, Rapid and sensitive anthrone-sulfuric acid assay in microplate format to quantify carbohydrate in biopharmaceutical products: Method development and validation, *Biologicals* **36** (2008) 134-141.
